# Supplementary material
Source: PubMed Central journal article supplement (PMC3075792)
Supplement: pp.110.166934_1.pdf [file pp.110.166934_1.pdf]

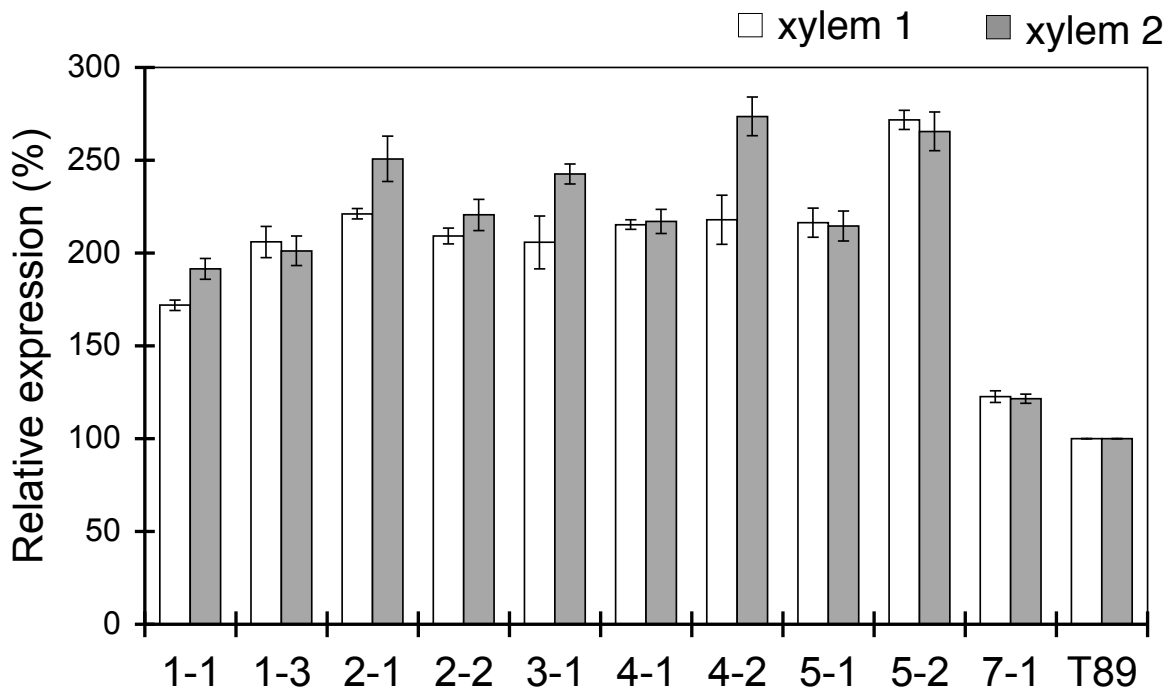

Figure S1.

*PtxtXET16-34* transcript levels in the wood-forming tissues of *PtxtXET16-34* sense transgenic lines relative to WT (T89) levels as determined by RT-PCR.

After four months of growth in soil, total RNA from primary- and secondary-walled developing xylem of the 40th to 50th was extracted to analyze the expression level of *PtxtXET16-34* in each transgenic line by the competitive RT-PCR. Expression was first normalized to the 18S RNA level and then to the WT. Xylem 1 - primary-walled developing xylem tissue; Xylem 2 - secondary walled developing xylem tissue. Averages of three independent experiments  $\pm$  SE.

Methods:

***Relative quantitative RT-PCR***

The selected transgenic lines and WT hybrid aspen were grown in a greenhouse for four months. Xylem 1 and 2 fractions were obtained as described above from internodes 40th to 50th. Total RNA was extracted with the RNeasy mini kit (Qiagen, Valencia, CA) either directly from the ground tissue or from crude RNA preparation obtained by the hot hexadecyltrimethylammonium bromide (Sigma, St. Louis, MO) extraction procedure (Chang et al., 1993). RT was performed using the RetroScript kit (Ambion, Austin, TX), according to the manufacturer's instructions with random primers and 1.7 µg of total RNA as template. *PtxtXET16-34* transcript quantities were determined by the semi-quantitative RT-PCR using 18S rRNA as internal control using QuantumRNA kit (Ambion, Austin, TX) according to the manufacturer's instructions. Gene-specific primer pair, capable of amplifying a 0.38-kb *PtxtXET16-34* fragment was XET16A-3UTR-F (AGTTCCAAGATCTGGATGCCTTC) and PtXET16A-rev (TGGTTCATTACAGTTTGACAACACAA). PCR cycle numbers were 25 (xylem 1) and 27 (xylem 2) in the OE lines, and 29 (xylem 1) and 34 (xylem 2) for RNAi lines. PCR products were analyzed on a 1.5% (w/v) agarose gel containing ethidium bromide and the signal intensities were determined with a Typhoon scanner 9600 (Amersham Biosciences) and Documentation System and Molecular Analyst software (Bio-Rad Laboratories, Hercules, CA). Each experiment was repeated at least three times using the same cDNA source, originating from pooled material of five to seven plants per genotype.

References:

**Chang, S., Puryear, J. and Cairney, J. (1993)** A simple and efficient method for isolating RNA from pine trees. *Plant Mol Biol Reporter*, **11**, 113-116.

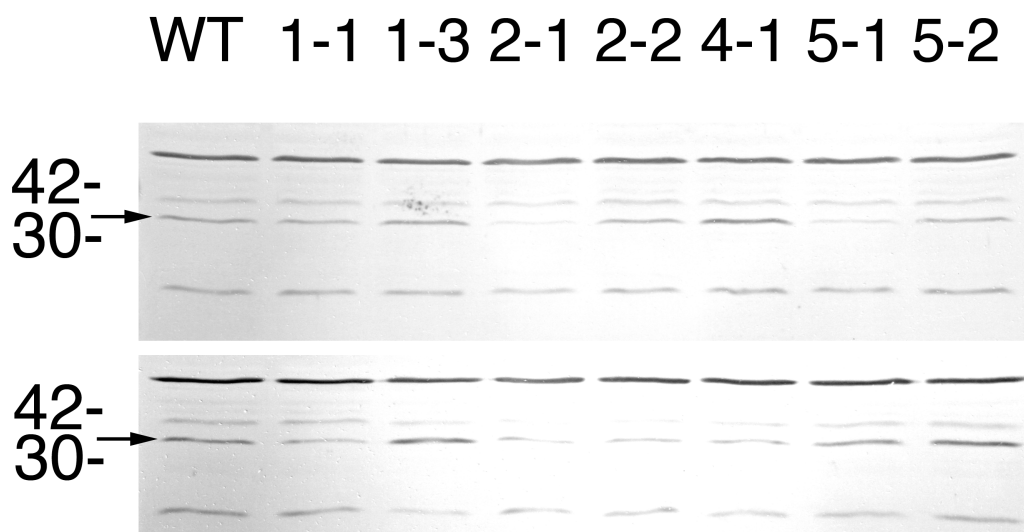

Figure S2.

Western blotting of proteins extracted from developing xylem tissues in *PtxtXET16-34*-overexpressing lines and the WT. XET16A antibody was raised against the recombinant *PtxtXET16-34* protein (Bourquin et al, 2002). Upper and lower panel represent primary- and secondary-walled developing xylem, respectively. The specific signal is indicated by the arrows. Other bands represent unspecific binding of the polyclonal antibody and visualize the variation in protein loading.

Proteins were extracted from primary- and secondary-walled developing xylem of the 40<sup>th</sup> to 50<sup>th</sup> internode tissues by incubation of the powdered tissue in Laemmli buffer. Primary XET16A antibody CHAD was used at 1:1000 dilution. Secondary antibodies conjugated to alkaline phosphatase were used for detection of the signal.

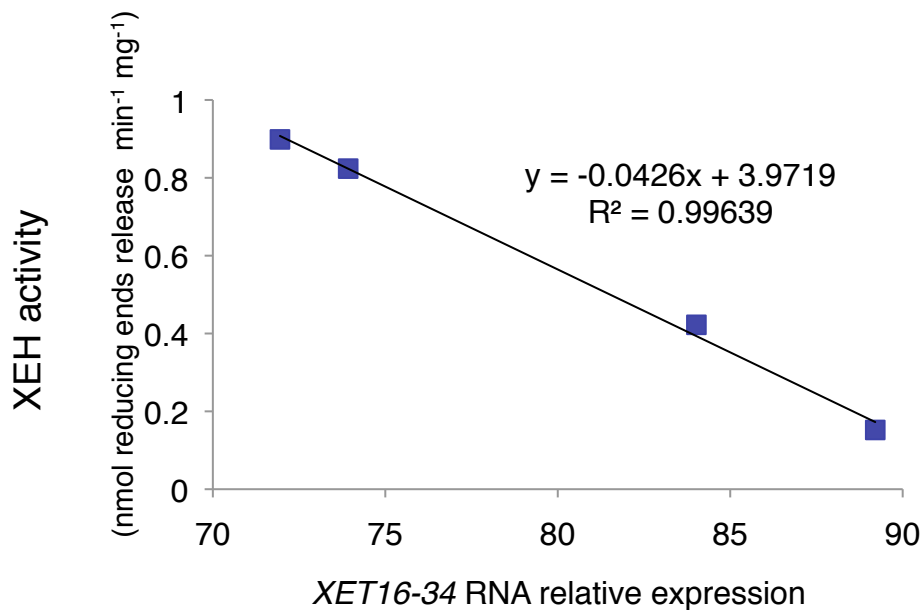

Figure S3.

Relationship between xyloglucan endo-hydrolase (XEH, EC= 3.2.1.151 ) activity and *PtxtXET16-34* expression level in secondary walled developing xylem of transgenic lines overexpressing *PtxtXET16-34*. The activity was measured in protein extracts as an increase in concentration of reducing sugars. *PtxtXET16-34* expression is relative to 18S RNA signal.

#### Xyloglucan endo-hydrolase activity assay

Primary- and secondary-walled xylem tissue fractions from internodes 40-50 of four to five trees representing each line were scraped into liquid nitrogen and ground. 100 mg of tissue powder was combined with 0.5 ml of ice-cold extraction buffer (50mM NaP buffer pH7, 2mM EDTA, 4% PVP mw 360 000, 1mM DTT). The samples were extracted at 4 °C for 30 min with shaking and then centrifuged for 15 min at 4 °C in a table centrifuge at maximum speed. The supernatants containing between 0.46 and 0.94 mg protein per ml, as determined by the Bradford assay, were collected.

Xyloglucan endo-hydrolase activity in protein extracts was assayed by measuring reducing sugars by the Nelson-Somogyi procedure (Nelson, 1944; Somogyi, 1952). The tests were performed using 100 mg of xyloglucan (Megazyme) and 80µl of extracted protein according to Megazyme instruction. Reaction was carried out at 25°C overnight, stopped and absorbance was measured at 520nm. As a positive control 2 mg of xyloglucan endoglucanase (XEG) generously provided by Novozymes A/S, Denmark, were used instead of extracted proteins. Negative controls were prepared from proteins extract heated for 10 min at 95°C as well as by adding Nelson-Somogyi stopping solution to xyloglucan before adding proteins extract. The activity in triplicate samples of each line was measured, and their average specific activity was calculated in nanomoles of reducing ends per 1 mg of extracted protein per minute.

**Nelson N** (1944) A photometric adaptation of the Somogyi method for the determination of glucose. *J Biol Chem* **153**: 375-381.

**Somogyi M** (1952) Notes on sugar determination. *J Biol Chem* **195**: 19-23.

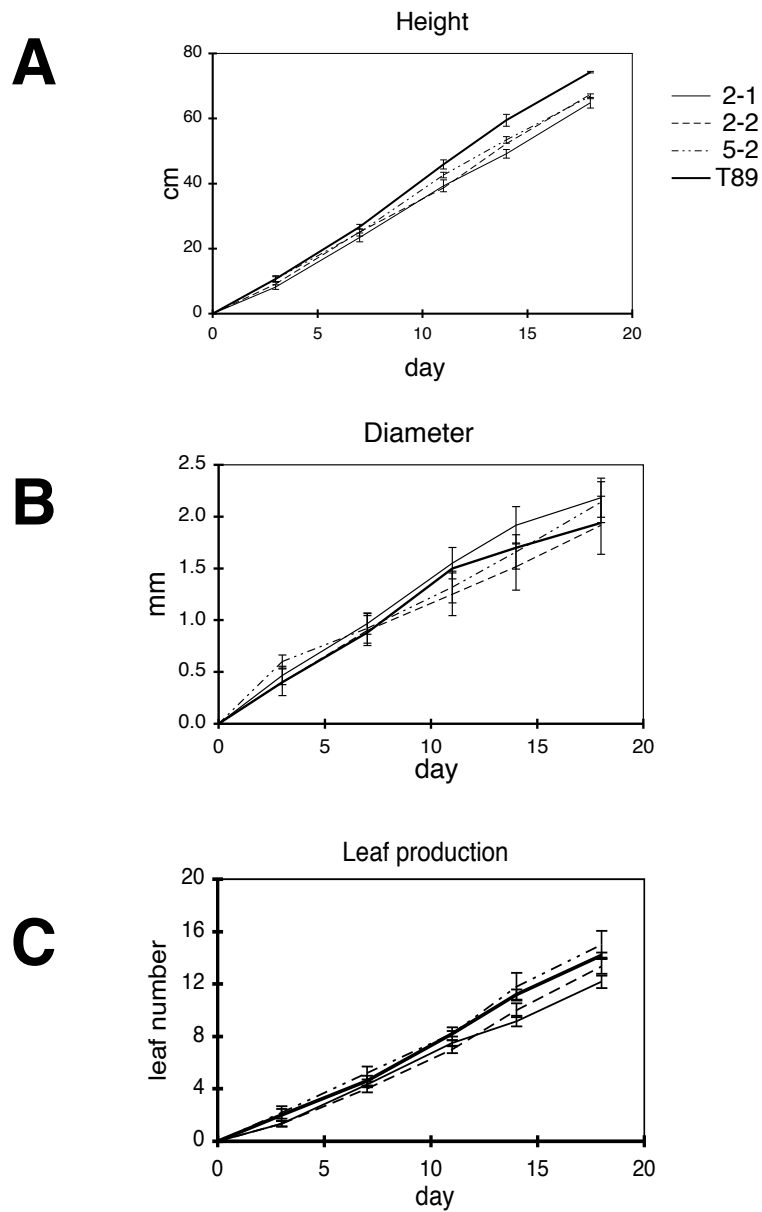

Figure S4.  
Effects of *PtxtXET16A-34* overexpression on plant growth.

Overexpression of *PtxtXET16-34* in transgenic poplar slightly inhibited stem elongation (**A**) but the diameter growth (**B**) and the number of leaves (**C**) were not significantly changed. Plants were measured one month after potting. T89 - WT.

Table S1. *Populus XTH* gene models as identified by Geisler-Lee et al., 2006, updated to the *P. trichocarpa* genome version 1.1 ([http://genome.jgi-psf.org/Poptr1\\_1/Poptr1\\_1.home.html](http://genome.jgi-psf.org/Poptr1_1/Poptr1_1.home.html)) and corresponding EST clones found in different tissue-specific libraries in the Swedish EST database (<http://www.populus.db.umu.se/>), or obtained by RT-PCR amplification from the cambial region mRNA using XET-specific degenerate primers (as indicated by the number after /).

| XTH No | Alias          | Accession numbers | Genemodel v1.1                     | protein ID | Location                    | EST clones/RT-PCR clones |                 |              |      |            |      |      |         |        |       |    |  |  |  |   |
|--------|----------------|-------------------|------------------------------------|------------|-----------------------------|--------------------------|-----------------|--------------|------|------------|------|------|---------|--------|-------|----|--|--|--|---|
|        |                |                   |                                    |            |                             | cambial region           | dormant cambium | tension wood | bark | apical bud | root | leaf | petiole | flower | seeds |    |  |  |  |   |
| 1      | S              | EF194048          | eugene3.14600001                   | 582987     | scaffold_1460:1-1079        | 0/1                      |                 |              |      |            |      |      |         |        |       |    |  |  |  |   |
| 2      |                |                   | fgenes4_pm.C_scaffold_131000027    | 811167     | scaffold_131:426441-427561  |                          |                 |              |      |            |      |      |         |        |       |    |  |  |  |   |
| 3      | M              | EF194053          | grail3.0018003901                  | 646298     | LG_III:9672371-9675879      |                          |                 | 1            |      |            |      |      |         | 1      |       |    |  |  |  |   |
| 4      |                |                   | eugene3.00660170                   | 594976     | scaffold_66:1165826-1166385 |                          |                 |              |      |            |      |      |         |        |       |    |  |  |  |   |
| 5      |                |                   | eugene3.01570037                   | 584043     | scaffold_157:396919-398369  |                          |                 |              |      |            |      |      |         |        |       |    |  |  |  |   |
| 6      | E              | EF194049          | fgenes4_pg.C_LG_VI000528           | 762218     | LG_VI:4521539-4522594       |                          | 5               |              | 1    | 1          | 7    |      | 1       | 2      | 9     |    |  |  |  |   |
| 7      |                |                   | fgenes4_pg.C_LG_IX001489           | 768438     | LG_IX:11581492-11583071     |                          |                 |              |      |            |      |      |         |        |       |    |  |  |  |   |
| 8      |                |                   | eugene3.00021425                   | 552110     | LG_II:11596427-11597141     |                          |                 |              |      |            |      |      |         |        |       |    |  |  |  |   |
| 9      |                |                   | eugene3.00040523                   | 555810     | LG_IV:5025762-5026321       |                          |                 |              |      |            |      |      |         |        |       |    |  |  |  |   |
| 10     |                |                   | eugene3.00110488                   | 568474     | LG_XI:5120628-5121988       |                          |                 |              |      |            |      |      |         |        |       |    |  |  |  |   |
| 11     |                |                   | estExt_Genewise1Plus.C_LG_XVIII23  | 1106803    | LG_XVIII:9720722-9721882    |                          |                 |              |      |            |      |      |         |        |       |    |  |  |  |   |
| 12     |                |                   | gw1.II.2740.1                      | 411405     | LG_II:4090484-4091490       |                          |                 |              |      |            |      |      |         |        |       |    |  |  |  | 2 |
| 13     |                |                   | estExt_Genewise1_v1.C_LG_V0594     | 714863     | LG_V:13766983-13767994      |                          |                 |              |      |            |      |      |         |        |       |    |  |  |  |   |
| 14     | K              | EF194054          | eugene3.00140931                   | 572886     | LG_XIV:7223569-7225157      | 0/3                      |                 |              |      |            |      | 1    |         | 1      |       | 1  |  |  |  |   |
| 15     |                |                   | e_gw1.II.270.1                     | 851311     | LG_II:22816722-22818310     |                          |                 |              |      |            |      |      |         |        |       |    |  |  |  |   |
| 16     |                |                   | gw1.XI.1790.1                      | 233810     | LG_XI:2158121-2159708       |                          |                 |              |      |            |      |      |         |        |       |    |  |  |  |   |
| 17     | I              | EF194056          | estExt_Genewise1_v1.C_LG_XVIII2839 | 737795     | LG_XVIII:9732450-9734010    | 0/4                      |                 |              | 2    |            | 2    |      |         |        |       |    |  |  |  | 2 |
| 18     |                |                   | estExt_Genewise1_v1.C_LG_XVIII2844 | 737800     | LG_XVIII:9738560-9739859    |                          |                 |              |      |            |      |      |         |        |       |    |  |  |  |   |
| 19     |                |                   | gw1.XVIII.2837.1                   | 262296     | LG_XVIII:9714098-9715068    |                          |                 |              |      |            |      |      |         |        |       |    |  |  |  |   |
| 20     |                |                   | fgenes4_pg.C_scaffold_171000033    | 786577     | scaffold_171:422480-423527  |                          |                 |              |      |            |      |      |         |        |       |    |  |  |  |   |
| 21     | G              | EF194058          | estExt_Genewise1_v1.C_LG_II3808    | 711462     | LG_II:22154322-22156560     | 0/24                     |                 |              |      | 2          |      |      |         | 1      | 1     | 6  |  |  |  |   |
| 22     |                |                   | fgenes4_pg.C_LG_IX000065           | 767014     | LG_IX:396662-397531         |                          |                 |              |      |            |      |      |         |        |       |    |  |  |  |   |
| 23     |                |                   | fgenes4_pg.C_LG_XVIII000708        | 779340     | LG_XVIII:8565029-8566704    |                          |                 |              |      |            |      |      |         |        |       |    |  |  |  |   |
| 24     |                |                   | eugene3.00110489                   | 568475     | LG_XI:5135299-5136430       |                          |                 |              |      |            |      |      |         |        |       |    |  |  |  |   |
| 25     | AA             | EF194051          | eugene3.00040079                   | 555366     | LG_IV:743969-746147         |                          |                 |              |      |            |      |      |         |        |       |    |  |  |  | 1 |
| 26     | B              | EF194046          | estExt_Genewise1_v1.C_LG_XIV2905   | 732010     | LG_XIV:6764512-6766654      | 1/1                      |                 |              |      |            |      |      |         |        |       |    |  |  |  |   |
| 27     | R              | EF194052          | grail3.0008019801                  | 640150     | LG_I:5147426-5150019        | 0/7                      |                 | 1            | 2    | 2          |      |      |         |        |       |    |  |  |  | 3 |
| 28     |                |                   | eugene3.00051083                   | 559468     | LG_V:13776227-13777443      |                          |                 |              |      |            |      |      |         |        |       |    |  |  |  |   |
| 29     | BB             | EF194045          | eugene3.00090819                   | 557559     | LG_IX:5040890-5042029       | 0/1                      |                 |              |      |            |      |      |         |        |       |    |  |  |  |   |
| 30     | H              | EF194057          | eugene3.00131219                   | 571855     | LG_XIII:12239791-12242484   | 10                       |                 | 1            |      | 1          |      |      |         | 1      |       | 1  |  |  |  | 1 |
| 31     |                |                   | eugene3.00160931                   | 576796     | LG_XVI:8835690-8838106      |                          |                 |              |      |            |      |      |         |        |       |    |  |  |  |   |
| 32     |                |                   | eugene3.00280224                   | 589488     | scaffold_28:2448009-2449922 |                          |                 |              |      |            |      |      |         |        |       |    |  |  |  |   |
| 33     |                |                   | eugene3.16810001                   | 584844     | scaffold_1681:5372-6543     |                          |                 |              |      |            |      |      | 1       |        |       |    |  |  |  |   |
| 34     | A <sup>1</sup> | AF515607          | estExt_Genewise1_v1.C_LG_III1280   | 712151     | LG_III:14324903-14327669    | 4/9                      |                 | 1            |      | 1          |      |      |         | 3      | 3     | 9  |  |  |  |   |
| 35     | C              | EF151160          | eugene3.00190998                   | 574524     | LG_XIX:11359460-11362792    | 5/4                      |                 | 6            |      | 5          |      |      |         |        |       | 22 |  |  |  |   |
| 36     | D              | EF194050          | grail3.0019035302                  | 655512     | LG_VII:12024185-12043591    |                          |                 |              | 7    | 2          |      |      | 2       | 9      | 2     |    |  |  |  |   |
| 37     |                |                   | eugene3.00130049                   | 570685     | LG_XIII:452955-454171       |                          |                 |              |      |            |      |      |         |        |       |    |  |  |  | 3 |
| 38     | T              | EF194047          | estExt_Genewise1_v1.C_LG_XIV2164   | 731609     | LG_XIV:4884130-4885664      |                          |                 |              | 3    |            |      |      |         |        |       |    |  |  |  |   |
| 39     | J              | EF194055          | estExt_Genewise1_v1.C_LG_VIII2102  | 720800     | LG_VIII:9147474-9150429     | 1/2                      |                 |              | 1    |            |      |      | 2       | 1      |       |    |  |  |  |   |
| 40     | L <sup>2</sup> |                   | grail3.0006015301                  | 658681     | LG_X:10736558-10738895      | 1                        |                 |              |      |            |      |      |         |        |       | 1  |  |  |  |   |
| 41     |                |                   | eugene3.00290248                   | 590065     | scaffold_29:2684768-2687263 |                          |                 |              |      |            |      |      |         |        |       |    |  |  |  |   |

<sup>1</sup> Bourquin et al., 2002

<sup>2</sup> Aspeborg et al., 2005
